1 **Title: Population fragmentation leads to morpho-functional variation in British red**  
2 **squirrels (*Sciurus vulgaris*)**

3 **Authors:** Philip G. Cox<sup>1</sup>, Philip J.R. Morris<sup>2</sup>, Andrew C. Kitchener<sup>3</sup>

4

5 **Affiliations**

6 <sup>1</sup>Department of Archaeology and Hull York Medical School, University of York, Heslington,  
7 York, YO10 5DD, UK

8 <sup>2</sup>School of Geosciences and Department of Integrative Biology, University of South Florida,  
9 4202 E. Fowler Avenue, Tampa, FL 33620, USA

10 <sup>3</sup>Department of Natural Sciences, National Museums Scotland, Chambers Street, Edinburgh,  
11 EH1 1JF, UK and Institute of Geography, School of Geosciences, University of Edinburgh,  
12 Drummond Street, Edinburgh EH9 3PX, UK

13

14 **Keywords**

15 Morphological evolution; masticatory biomechanics; mechanical advantage; geometric  
16 morphometrics; Sciuridae

17

18

19

20

21

22

23

24

25

26 **Abstract**

27 It is well-known that population fragmentation and isolation can lead to rapid morphological  
28 and functional divergence, with the effect being particularly well-documented in rodents. Here,  
29 we investigated whether such a phenomenon could be identified in the Eurasian red squirrel  
30 (*Sciurus vulgaris*), which was once widespread across the majority of Great Britain, but  
31 suffered a severe population decline across the 20<sup>th</sup> century, leaving a highly fragmented  
32 distribution. The aim was to test for morphological and biomechanical variation of the  
33 mandible between the remaining British red squirrel populations. Linear and geometric  
34 morphometric methods were used to analyse shape in a sample of over 250 squirrel mandibles  
35 from across the UK and Germany. Canonical variates analysis identified significant shape  
36 differences between most British red squirrel populations, but particularly between squirrels  
37 from Formby and those from other populations. Linear measurements showed that Formby red  
38 squirrels have a significantly lower mechanical advantage of the temporalis muscle, indicating  
39 that they are less efficient at gnawing. We suggest that this difference may be related to past  
40 supplemental feeding of Formby squirrels with peanuts, which are less mechanically resistant  
41 than food items that occur naturally in the diet of British red squirrels.

42

43

44

45

46

47

48

49

50

## 51 **Introduction**

52 It is well-established that fragmentation of a population and the resulting isolation of the  
53 fragments can readily lead to morphological divergence. This effect has been noted in a wide  
54 variety of clades across the Animal Kingdom including butterflies (Hill et al. 1999), salmonid  
55 fishes (Snorrason, et al. 1994), lizards (Losos et al. 1997; Sumner et al. 1999), finches (Grant,  
56 1999), and rodents (Renaud and Millien, 2001). Such divergence may represent the first step  
57 in allopatric speciation, the process by which a population splits into two reproductively  
58 isolated species as a result of an extrinsic barrier between them (Orr and Smith, 1998). The  
59 underlying mechanism leading to morphological divergence between isolated populations may  
60 be selective, i.e. an adaptive or plastic response to variations in local environmental pressures,  
61 or neutral, involving processes such as genetic drift or founder effect.

62

63 The rate of phenotypic change in isolated populations has been shown by many studies to be  
64 very rapid, with morphological variation following environmental change or introduction to a  
65 new habitat being detectable in just a few generations (Losos et al. 1997; Hale and Lurz, 2003;  
66 Kristjansson, 2005; Renaud et al. 2013; Holmes et al. 2016). In particular, island populations  
67 are known to undergo especially rapid morphological change, at least over short time periods  
68 (Millien, 2006), with the effect being particularly well-documented in rodents (Pergams and  
69 Ashley, 1999, 2001; Yom-Tov et al. 1999; Nargosen and Cardini, 2009). However, this effect  
70 is not restricted to islands and has also been shown to occur in mainland species subjected to  
71 habitat fragmentation (Schmidt and Jensen, 2003; Pergams & Lawler, 2009; Stumpp et al.  
72 2018), indicating that many mammal species have the capacity to evolve at fast rates under  
73 changing environmental conditions (Millien, 2006). The most frequently reported rapid  
74 morphological changes are those of body size or mass (e.g. Schmidt and Jensen, 2003; Yom-  
75 Tov et al. 2008; Gardner et al. 2011). However, a number of studies have demonstrated that

76 shape can also undergo change in a short period of time (e.g. Nargosen & Cardini, 2009;  
77 Franssen, 2011; Yazdi & Adriaens, 2011; Doudna and Danielson, 2015). The size and shape  
78 changes resulting from such rapid evolution on islands or in habitat fragments have been shown  
79 to have measurable functional consequences, particularly with regard to feeding biomechanics.  
80 For example, previous studies have demonstrated that morphological variation between  
81 closely-related insular species has resulted in different bite force capabilities in groups such as  
82 finches (Herrel et al. 2005), lizards (Herrel et al. 2008) and shrews (Cornette et al. 2012).  
83  
84 An ideal case study for studying the impact of population fragmentation and isolation is the  
85 British population of Eurasian red squirrels (*Sciurus vulgaris*). Once widespread across the  
86 majority of Great Britain (Shorten, 1954; Lloyd, 1983), the red squirrel began to suffer a severe  
87 population decline from the 1920s onwards (Gurnell, 1987). This has been attributed to various  
88 factors, such as loss of woodland habitat, competition with the introduced Eastern grey squirrel  
89 (*Sciurus carolinensis*), and parapoxvirus disease carried by grey squirrels (Tompkins et al.  
90 2002; LaRose et al. 2010). Whatever the underlying reason for the population decline, it has  
91 resulted in a highly reduced and fragmented distribution of British red squirrels (Gurnell and  
92 Pepper, 1993; Barratt et al. 1999). Currently, red squirrels are found in most parts of Scotland  
93 except for the Central Belt, and across the northernmost counties of England, i.e.  
94 Northumberland and Cumbria (Gurnell et al. 2014). There are also isolated populations in  
95 County Durham, the Yorkshire Dales, the National Trust reserve at Formby on the Lancashire  
96 coast, and in some coniferous forests in mid Wales (Cartmel, 1997; Shuttleworth, 2000; Hobbs,  
97 2005; Harris & Yalden, 2008). A population of red squirrels also existed in the lowland pine  
98 forest at Thetford in East Anglia until at least the early 21<sup>st</sup> century (Gurnell et al. 2002:  
99 Rushton et al. 2002), but now appears to be extinct (Mathews et al. 2018). Beyond mainland  
100 Great Britain, red squirrels are found on Anglesey, the Isle of Wight and five islands in Poole

101 Harbour, as well as on Jersey in the Channel Islands (Harris and Yalden, 2008; Simpson et al.  
102 2010; Shuttleworth, 2010).

103

104 It should be noted that the remaining red squirrel populations in Britain are not all simply the  
105 relicts of a native subspecies distinct from red squirrels from mainland Europe. There have  
106 been numerous introductions of red squirrels from continental Europe over the last 150 years  
107 (Hale et al. 2004). In particular, the Jersey population was introduced from Europe, probably  
108 France, and southern England in the 1880s (Magris and Gurnell, 2001), and the Formby  
109 population was introduced from Europe, possibly Scandinavia, in the early to middle 20<sup>th</sup>  
110 century (Lowe and Gardiner, 1983; Gurnell and Pepper, 1993). The red squirrels in the western  
111 half of northern England appear to be native, but in the east there have been some introductions  
112 from continental Europe (Hale and Lurz, 2003). Finally, the Scottish population seems to be  
113 mainly derived from re-introductions from England, but there have also been some  
114 introductions of individuals from Scandinavia (Harvie-Brown, 1880-1881).

115

116 The aim of this study is to determine whether the remaining isolated populations of British red  
117 squirrels have diverged in morphology from one another, and to assess the functional impact  
118 of any morphological differences. Specifically, it is hypothesised that differences in mandibular  
119 shape will be detectable between populations. This is predicted based on the phenomenon of  
120 rapid morphological change being well-known in rodents (Stumpp et al. 2018), and will be  
121 tested using geometric morphometrics (GMM; O'Higgins, 2000). It is also hypothesised that  
122 morphological variation in mandibular shape between squirrel populations will have a  
123 measurable impact on feeding biomechanics, as changes to the position of masticatory muscle  
124 insertions relative to the skull will impact the ability of those muscles to produce bite force.  
125 This second hypothesis will be tested using linear biomechanical measures.

126

## 127 **Methods**

### 128 *Sample*

129 The sample comprised 263 skeletonised red squirrel specimens from National Museums  
130 Scotland (Edinburgh, UK), most of which were collected between 1994 and 2006. Only  
131 specimens with associated location data were selected for this analysis. The sample included  
132 individuals from most areas of Great Britain and its offshore islands where red squirrels have  
133 been present over the last three decades, plus a number of specimens from Germany. The  
134 specimens chosen for analysis were grouped into the following geographical regions: North  
135 Scotland (Scotland north of the Central Belt); South Scotland (Scotland south of the Central  
136 Belt); North England (Northumberland and Cumbria); Formby; Thetford; Isle of Wight; Jersey;  
137 and Germany. Unfortunately, insufficient specimens from Wales were available for inclusion  
138 in the analysis. The number of specimens from each region is given in Table 1. From each  
139 specimen, one hemi-mandible was selected for analysis. Where both hemi-mandibles were  
140 present and undamaged, the right was used in preference to the left.

141

### 142 *Morphometrics*

143 Hemi-mandibles were laid flat with the external lateral surface facing upwards on paper marked  
144 with 0.5 mm squares (for scaling purposes). The specimens were photographed with a  
145 Panasonic Lumix DMC-TZ60 camera, secured on a tripod at a constant distance from the  
146 bench. A set of 12 two-dimensional landmarks, based on previous studies of rodent mandibles  
147 (e.g. Zelditch et al. 2008, 2015; Casanovas-Vilar and van Dam, 2013), was recorded from each  
148 photograph using the tpsDig2 software (Rohlf, 2018). The landmarks are illustrated and  
149 described in Figure 1A. Landmark co-ordinates from all 263 specimens were aligned via  
150 generalised Procrustes superimposition, and then subjected to a principal components analysis

151 (PCA). Differences between populations were assessed using canonical variates analysis  
152 (CVA). Mahalanobis distances were calculated and the statistical significance of differences  
153 between groups was assessed with a permutation test of 10,000 repeats. All GMM analyses  
154 were carried out in MorphoJ (Klingenberg, 2011).

155

### 156 *Biomechanics*

157 To elucidate the functional significance of any morphological variation between red squirrel  
158 populations, the mechanical advantage (MA) of three of the major jaw-closing muscles –  
159 temporalis, superficial masseter, and deep masseter – was estimated from linear measurements  
160 of the jaw (following Casanovas-Vilar and van Dam, 2013; Gomes Rodrigues et al. 2016). MA  
161 was calculated as the ratio of the muscle in-lever to the biting out-lever. To measure the lever  
162 lengths, an extra landmark was recorded at the dorsalmost point of the condyle articular surface  
163 (not included in the GMM analysis to avoid over-representing the condyle). The temporalis in-  
164 lever was measured from the condyle to the tip of the coronoid, the superficial masseter in-  
165 lever was measured from the condyle to the posterior tip of the angular process, and the deep  
166 masseter in-lever was measured from the condyle to the anteriormost point on the masseteric  
167 fossa margin. All muscle in-levers were compared to the out-lever representing incisor biting.  
168 As many of the specimens had missing or dislocated incisors, the out-lever was measured from  
169 the condyle to the dorsal margin of the incisor alveolus (as in Gomes Rodrigues et al. 2016).  
170 In and out-levers are illustrated in Figure 1B.

171

172 Muscle MAs were compared between red squirrel populations using ANOVA and post-hoc  
173 Tukey tests. The potential influence of size on MA was tested for using log centroid size  
174 calculated during the GMM analyses. All linear statistics were undertaken in PAST 3.06  
175 (Hammer et al. 2001).

176

## 177 **Results**

### 178 *Shape analysis*

179 The distribution of individuals across the first two principal components, representing 24.9%  
180 and 18.7% of total variance respectively, is shown in Figure 2A. Little, if any, separation  
181 between the red squirrel populations is seen on these axes. PC1 represents changes to the  
182 morphology of the ventral margin of the mandible with mandibles at the positive end of the  
183 axis showing a more postero-ventrally deflected angular process. PC2 represents change in the  
184 body of the mandible from relatively shallow (negative) to deep (positive).

185

186 Greater separation of squirrel populations is seen on the third and fourth PCs (11.1% and 7.9%  
187 total variance respectively), particularly with regard to the Formby population which is located  
188 in the positive PC3 and negative PC4 quadrants of Figure 2B. Mandibles at the negative end  
189 of PC3 have an anteriorly positioned coronoid and a relatively short angular process whereas  
190 mandibles with positive PC3 scores (such as the Formby squirrels) have a coronoid process  
191 that is more posteriorly positioned on the mandible and a more posteriorly extended angular  
192 process. Shape change along PC4 is more subtle, but again relates to the position of the  
193 coronoid process relative to the molar tooth row and condyle.

194

195 A plot of the first two canonical variates, together representing over 75% of total variance, is  
196 shown in Figure 3. It demonstrates a clear separation between many of the red squirrel  
197 populations, with the populations from Formby and Germany being particularly distinct.  
198 Permutation tests of 10,000 rounds indicate highly significant ( $P < 0.001$ ) Mahalanobis  
199 distances between all pairs of red squirrel populations except between Northern England and  
200 Southern Scotland ( $P < 0.01$ ), and the two smallest samples in this analysis, Thetford and the



201 Isle of Wight (not significant). Mahalanobis distances and associated  $P$  values are given in  
202 Table S1.

203

#### 204 *Biomechanical analysis*

205 The mean MA of each of the jaw-closing muscles in each of the red squirrel populations is  
206 given Table 2. Distributions within each population are shown in the boxplots in Figure 4.

207 ANOVA tests revealed highly significant differences in MA between populations for the  
208 temporalis ( $F = 24.95$ ,  $P < 0.001$ ), superficial masseter ( $F = 3.09$ ,  $P < 0.01$ ), and deep masseter

209 ( $F = 3.45$ ,  $P < 0.01$ ). It can be seen that the Formby squirrels have a much lower mean

210 temporalis MA (0.181) than all other populations (0.205-0.225). Post-hoc pairwise Tukey tests

211 confirmed significant differences between the Formby population and all other populations

212 (Table S2). Significant differences were also revealed between the Jersey population and the

213 Northern England, and both Scottish populations, and between the sample from Germany and

214 the South Scotland and Northern England squirrels (Table S2). The mean MA for the

215 superficial masseter ranged between 0.390 and 0.408 across different populations. No

216 significant differences were found between pairs of populations except between those from

217 Jersey and North Scotland (Table S3). The mean MA for the deep masseter ranged between

218 0.625 and 0.656. Significant differences were found between the German squirrels and the

219 populations from Scotland and Northern England (Table S4).

220

221 An ANOVA revealed significant differences ( $F = 11.00$ ,  $P < 0.001$ ) in log centroid size of the

222 mandible between squirrel populations. Post-hoc Tukey tests (Table S5) showed that the

223 German squirrel mandibles are significantly larger than those of all other populations except

224 Formby, and also that the Formby mandibles are significantly larger than those of all other

225 populations except Germany and Jersey. Superficial masseter MA was found to be significantly

226 positively correlated with size ( $R = 0.404$ ,  $P < 0.001$ ), as was deep masseter MA, although less  
227 strongly ( $R = 0.152$ ,  $P < 0.05$ ). The temporalis MA showed no significant correlation with  
228 mandibular centroid size ( $R = -0.109$ ).

229

## 230 **Discussion**

231 The decline of red squirrels in the UK and their replacement by invasive grey squirrels is a  
232 well-documented phenomenon (Lloyd, 1983; Gurnell, 1987). The current population of red  
233 squirrels in Great Britain is highly fragmented and mostly confined to northern areas and  
234 offshore islands (Gurnell and Pepper, 1993; Barratt et al. 1999; Mathews et al. 2018). The  
235 results of this study show that these isolated British red squirrel populations exhibit significant  
236 differences in mandibular morphology and mandibular function from one another, and from  
237 red squirrels from continental Europe. Notably, the red squirrel population from Formby, on  
238 the Lancashire coast, is shown to be particularly distinct from all other British populations,  
239 both in shape and biomechanical capabilities.

240

### 241 *Mandibular shape*

242 The first hypothesis of this study, that differences in mandibular morphology between  
243 populations of red squirrels would be detectable with GMM, is supported clearly by the  
244 canonical variates analysis. CVA discriminates almost all populations from one another based  
245 on Mahalanobis distances (Table S1), with the separation of the Formby, Jersey and Germany  
246 populations being particularly evident on the plot of the first two canonical variates (Figure 3).  
247 This is perhaps not surprising as these three populations are each completely isolated from  
248 other red squirrel populations, whereas some of the other groupings defined in this analysis  
249 may not be completely separated from each other, e.g. North England, South Scotland and  
250 North Scotland. Furthermore, both the Formby and Jersey populations derive from continental

251 Europe populations (Gurnell and Pepper, 1993; Magris and Gurnell, 2001), which may explain  
252 why they group with the German squirrels on CV1. In contrast, the PCA does not obviously  
253 discriminate between populations on the first two components (Figure 2A), although some  
254 separation can be seen on PC3 and PC4 (Figure 2B). The distribution of individuals on the first  
255 two principal components may be an artefact of the landmark set. Most of the shape change on  
256 PCs 1 and 2 is seen on the ventral margin of the mandible, specifically related to movements  
257 of landmarks 9 and 10. These two landmarks both represent maxima of curves and were noted  
258 to be more difficult to place reliably than other landmarks in the set. Future work with a set of  
259 semi-landmarks along the ventral mandibular margin may resolve this issue. On the third and  
260 fourth components, it is the Formby population that seems the most distinct in mandibular  
261 shape, as in the CVA. Examination of the shape changes along these PCs indicates that the  
262 position of the coronoid process relative to the condyle is the major morphological difference.

263

#### 264 *Biomechanical performance*

265 The second hypothesis, which predicted that differences in biomechanical performance would  
266 be detected between red squirrel populations, was also supported by the results here. The MA  
267 of the temporalis muscle in Formby red squirrels was shown to be significantly lower ( $P <$   
268  $0.0001$ ) than that of all other squirrel populations (Table S2). This aligns with the results from  
269 the shape analysis which indicated that the Formby squirrel mandibles have a coronoid process  
270 that is positioned closer to the condyle and further from the teeth. In addition, the MA of the  
271 temporalis MA in the Germany and Jersey populations was also shown to be significantly lower  
272 than some of the other squirrel populations, although to a much lesser extent. Analyses of  
273 centroid size showed that mandibles of the Formby and German squirrels were significantly  
274 larger than those of most other populations, but no significant correlation was found between

275 centroid size and temporalis MA. Therefore, the reduced temporalis MA in these two  
276 populations does not appear to be an effect of allometric shape change.

277

278 No significant differences were detected in the MA of the superficial masseter muscle between  
279 populations, except in the singular case of the Jersey population versus the North Scotland  
280 population (Jersey squirrels have a higher superficial masseter MA than North Scotland  
281 squirrels). Similarly, only three significant differences in deep masseter MA were found, all  
282 between the German squirrels and other populations (Northern England and the two Scottish  
283 groupings). Although a positive correlation was found between deep masseter MA and size,  
284 the German squirrel mandibles had a significantly lower deep masseter MA, despite being  
285 significantly larger in size than all other populations. Thus, the functional differences found in  
286 German squirrel mandibles do not appear to be the result of allometric size change that is  
287 common to the whole sample.

288

289 A number of caveats to the biomechanical analysis should be noted to ensure that the results  
290 here are interpreted with appropriate levels of caution. Firstly, the use of lever arms to  
291 determine mechanical advantage will only give approximate results. To calculate MA more  
292 accurately, one should use moment arms i.e. the perpendicular distance between the condyle  
293 and the vector running between the muscle origin and insertion. This was not done as it would  
294 have required the skull and mandible to have been articulated in the photographs and intact  
295 skulls were not available for many of the specimens. Secondly, the representation of a muscle  
296 insertion as a single point is clearly inaccurate as the temporalis, superficial masseter and deep  
297 masseter all have large attachment sites on the squirrel mandible. Furthermore, all three  
298 muscles are complex and are divided into sections which have different fibre orientations and  
299 lines of action (Cox and Jeffery, 2011, 2015). Lastly, the analysis was conducted in 2D which

300 ignores any lateral component to the mandible. Despite these simplifications to the  
301 biomechanical analysis, it was felt that the results generated were still meaningful, as the  
302 simplifications were consistent across all specimens and because squirrel hemi-mandibles are  
303 sciurognathous and therefore largely planar (Hautier et al. 2015).

304

### 305 *Formby red squirrels*

306 The mandibles sampled from the red squirrel population in Formby were particularly distinct  
307 from those of other red squirrels in most of the analyses presented here. In particular, the  
308 Formby squirrels have been shown to have a much lower temporalis MA than all other British  
309 red squirrel populations (Figure 4C). The temporalis muscle in mammals is associated with  
310 fast closing of the jaws and a powerful bite force at the anterior teeth (Maynard Smith and  
311 Savage, 1959). Thus, the Formby squirrels appear to be less efficient at incisor gnawing than  
312 other squirrels in this sample – a situation that could be related to a number of (not necessarily  
313 mutually exclusive) factors.

314

315 First, it is important to note that the red squirrels at Formby appear not to be a fragment of the  
316 native British population, but originate from a European (possibly Scandinavian) population  
317 introduced to Ainsdale, Lancashire in the early 1930s (Lowe and Gardiner 1983; Gurnell and  
318 Pepper, 1993). Thus it might be suspected that the morphological distinctiveness of Formby  
319 red squirrels is a result of their different genetic background. However, this is probably too  
320 simplistic a view. The history of red squirrels in Britain has included numerous translocations  
321 from Europe over the last 200 years, leading to a complex phylogenetic relationship between  
322 current populations and no clear phylogeographical pattern (Barratt et al. 1999; Hale et al.  
323 2004). A sample of red squirrels from Germany was included in this analysis to assess  
324 similarities between European and British populations. CVA distinguished the German

325 squirrels from all other populations, and showed almost no overlap between the samples from  
326 Germany and Formby. Furthermore, the red squirrels from Germany did not show the highly  
327 reduced temporalis MA that was seen in the Formby squirrels.

328

329 Secondly, the red squirrel population at Formby is also known to be highly inbred, owing to  
330 the small founder population. This could have negatively affected the biomechanical  
331 capabilities of the mandible, as increased developmental instability and fluctuating asymmetry  
332 in the craniodental region has been suggested by some researchers to be associated with  
333 inbreeding and homozygosity (Leamy et al. 2002; Schaefer et al. 2006). However, others have  
334 found no evidence for this relationship (Markow, 1995), and a recent study on mice found no  
335 impact of inbreeding depression on bite force (Ginot et al. 2018).

336

337 Finally, the Formby red squirrel population, unlike all other populations in this analysis, is  
338 managed. The Sefton coast is a Special Area of Conservation and the pinewoods are a National  
339 Trust reserve for red squirrels. For several decades, the diet of the squirrel population at Formby  
340 was supplemented with peanuts provided by the National Trust and by the public (Gurnell &  
341 Pepper, 1993; Rice-Oxley, 1993; Shuttleworth, 2000), although this practice is now much  
342 reduced (A. Brockbank, pers. comm.). Peanuts are much less mechanically resistant than most  
343 of the food items that squirrels would naturally encounter in the UK (beech nuts, hazelnuts,  
344 conifer scales and seeds; Mollar, 1983). Thus it is possible that the morphology of the  
345 mandible, and hence the efficiency of gnawing, has changed in response to this change in diet.  
346 This explanation is consistent with the results seen here, as the less mechanically demanding  
347 peanuts could lead to a reduction in the MA of the temporalis, which is important for gnawing,  
348 but would have less effect on the MA of the superficial or deep masseter muscles, as they are  
349 more closely related to molar chewing. The morpho-functional change seen in Formby red

350 squirrels could either be an evolutionary response that has occurred over a number of  
351 generations (as seen in insular populations e.g. Herrel et al. 2008; Cornette et al. 2012), or a  
352 plastic response that occurs across the lifetime of each individual exposed to supplemental  
353 feeding (as seen in laboratory animals raised on different diets e.g. He and Kiliaridis, 2003;  
354 Enomoto et al. 2010; Anderson et al. 2014). To tease apart these two possibilities would require  
355 a larger, well-dated sample of Formby red squirrel specimens spanning a number of decades.

356

357 The results generated by this study have important implications for conservation efforts related  
358 to British red squirrels. Garden feeding of red squirrels is popular amongst members of the  
359 public but may have unsuspected impacts on skeletal morphology if the food provided is less  
360 mechanically demanding than the squirrels would eat in the wild. Many conservation strategies  
361 in the UK currently involve translocation of squirrel individuals from well-populated areas or  
362 captive-breeding facilities to bolster threatened populations or initiate new ones. If it is true  
363 that supplemental feeding at Formby has led to changes in mandibular morphology that reduce  
364 the efficiency of gnawing, then diet must be taken into consideration during such  
365 translocations. The results here suggest that red squirrels may not thrive if moved to a habitat  
366 with a more mechanically demanding food source, or if supplementary feeding is withdrawn  
367 suddenly. This is consistent with previous research demonstrating that translocated red  
368 squirrels tend to survive longer in release sites that have a similar habitat to the origin site  
369 (Kenward and Hodder, 1998), and that animals released in unfamiliar habitat will tend to  
370 disperse away from the release site (Morris et al. 1993; Bright and Morris, 1994).

371

372 The conclusion that supplemental feeding has led to morphological change and the  
373 consequences this could have for conservation strategy is tantalising, but at the moment still  
374 preliminary. Future studies are planned that combine morphological with genetic data, that

375 include data from the skull as well as the mandible, a longer time series of squirrels and that  
376 take advantage of more sophisticated biomechanical modelling techniques, in order to better  
377 understand the drivers of morpho-functional change in fragmentary populations such as British  
378 red squirrels.

379

### 380 **Author contributions**

381 PGC conceived the study, photographed the mandibles and wrote the first draft of the  
382 manuscript. PJRM landmarked the specimens. ACK provided access to the specimens. All  
383 authors contributed to the final manuscript and approved its contents.

384

### 385 **Acknowledgements**

386 We are grateful to the following people for helpful discussions on the analysis and  
387 interpretation of our data: Sam Cobb, Paul O'Higgins, Rob Ogden, Jeff Schoenebeck, and Mel  
388 Tonkin. We thank Andrew Brockbank of the National Trust for information on current squirrel  
389 management practices at Formby. PGC thanks Graham and Tis Buckley for accommodation in  
390 Edinburgh during data collection visits.

391

### 392 **References**

393 Anderson, P.S.L., S. Renaud, and E.J. Rayfield. 2014. Adaptive plasticity in the mouse  
394 mandible. *BMC Evol. Biol.* 14:85.

395 Barratt, E.M., J. Gurnell, G. Malarky, R. Deaville, and M.W. Bruford. 1999. Genetic  
396 structure of fragmented populations of red squirrel (*Sciurus vulgaris*) in the UK. *Mol.*  
397 *Ecol.* 8:S55-S63.

398 Bright, P.W., and P.A. Morris. 1994. Animal translocation for conservation: performance of  
399 dormice in relation to release methods, origin and season. *J. Appl. Ecol.* 31:699-708.



- 400 Cartmel, S. 1997. A study of red and grey squirrels in Clocaenog Forest, North Wales: a  
401 preliminary study. Pp. 89-95 in J. Gurnell and P.W.W. Lurz, eds. The conservation of  
402 red squirrels, *Sciurus vulgaris* L. PTES, London.
- 403 Casanovas-Vilar, I., and J. van Dam. 2013. Conservatism and adaptability during squirrel  
404 radiation: what is mandible shape telling us? PLoS ONE 8:e61298.
- 405 Cornette, R., A. Herrel, J.-F. Cosson, F. Poitevin, and M. Baylac. 2012. Rapid morpho-  
406 functional changes among insular populations of the greater white-toothed shrew.  
407 Biol. J. Linn. Soc. 107:322-331.
- 408 Cox, P.G., and N. Jeffery. 2011. Reviewing the morphology of the jaw-closing musculature  
409 in squirrels, rats, and guinea pigs with contrast-enhanced microCT. Anat. Rec.  
410 294:915-928.
- 411 Cox, P.G., and N. Jeffery. 2015. The muscles of mastication and the function of the medial  
412 pterygoid. Pp. 350-372 in P.G. Cox and L. Hautier, eds. Evolution of the rodents:  
413 advances in phylogeny, functional morphology and development. Cambridge  
414 University Press, Cambridge, UK.
- 415 Doudna, J.W., and B.J. Danielson. 2015. Rapid morphological change in the masticatory  
416 structures of an important ecosystem service provider. PLoS ONE 10:e0127218.
- 417 Enomoto, A., J. Watahiki, T., Yamaguchi, T. Irie, T. Tachikawa, and K. Maki. 2010. Effects  
418 of mastication on mandibular growth evaluated by microcomputed tomography. Eur.  
419 J. Orthodont. 32:66-70.
- 420 Franssen, N.R. 2011. Anthropogenic habitat alteration induces rapid morphological  
421 divergence in a native stream fish. Evol. Appl. 4:791-804.
- 422 Gardner, J.L., A. Peters, M.R. Kearney, L. Joseph, and R. Heinsohn. 2011. Declining body  
423 size: a third universal response to warming. Trends Ecol. Evol. 26:285-291.

- 424 Ginot, S., S. Agret, and J. Claude. 2018. Bite force performance, fluctuating asymmetry and  
425 antisymmetry in the mandible of inbred and outbred wild-derived strains of mice  
426 (*Mus musculus domesticus*). *Evol. Biol.* 45:287-302.
- 427 Gomes Rodrigues H., R. Šumbera, and L. Hautier. 2016. Life in burrows channelled the  
428 morphological evolution of the skull in rodents: the case of African mole-rats  
429 (*Bathyergidae*, Rodentia). *J. Mammal. Evol.* 23:175-189.
- 430 Gurnell, J. 1987. The natural history of squirrels. Christopher Helm, London.
- 431 Gurnell, J., and H. Pepper. 1993. A critical look at conserving the British Red Squirrel  
432 *Sciurus vulgaris*. *Mammal. Rev.* 23:127-137.
- 433 Gurnell, J., M.J. Clark, P.W.W. Lurz, M.D.F. Shirley, and S.P. Rushton. 2002. Conserving  
434 red squirrels (*Sciurus vulgaris*): mapping and forecasting habitat suitability using a  
435 Geographic Information Systems Approach. *Biol. Conserv.* 105:53-64.
- 436 Gurnell, J., P. Lurz, and W. Bertoldi. 2014. The changing patterns in the distribution of red  
437 and grey squirrels in the North of England and Scotland between 1991 and 2010  
438 based on volunteer surveys. *Hystrix* 25:83-38.
- 439 Hale, M.L., and P.W.W. Lurz. 2003. Morphological changes in a British mammal as a result  
440 of introductions and changes in landscape management: the red squirrel (*Sciurus*  
441 *vulgaris*). *J. Zool.* 260:159-167.
- 442 Hale, M.L., P.W.W. Lurz, and K. Wolff. 2004. Patterns of genetic diversity in the red squirrel  
443 (*Sciurus vulgaris* L.): footprints of biogeographic history and artificial introductions.  
444 *Conserv. Genet.* 5:167-179.
- 445 Hammer, Ø., D.A.T. Harper, and P.D. Ryan. 2001. PAST: Palaeontological Statistics  
446 software package for education and data analysis. *Palaeontol. Elec.* 4:9.
- 447 Harris, S., and D. Yalden. 2008. Mammals of the British Isles. 4th ed. The Mammal Society,  
448 Southampton, UK.

- 449 Harvie-Brown, J.A. 1880-1881. The history of the squirrel in Great Britain. Proc. R. Phys.  
450 Soc. Edin. 5:343-348; 6:31-63; 6,115-183.
- 451 Hautier, L., P.G. Cox, and R. Lebrun. 2015. Grades and clades among rodents: the promise of  
452 geometric morphometrics. Pp. 350-372 in P.G. Cox and L. Hautier, eds. Evolution of  
453 the rodents: advances in phylogeny, functional morphology and development.  
454 Cambridge University Press, Cambridge, UK.
- 455 He, T., and S. Kiliaridis. 2003. Effects of masticatory muscle function on craniofacial  
456 morphology in growing ferrets (*Mustela putorius furo*). Eur. J. Oral Sci. 111:510-517.
- 457 Herrel, A., J. Podos, S.K. Huber, and A.P. Hendry. 2005. Bite performance and morphology  
458 in a population of Darwin's finches: implications for the evolution of beak shape.  
459 Funct. Ecol. 19:43-48.
- 460 Herrel, A., K. Huyghe, B. Vanhooydonck, T. Backeljau, J. Breugekmans, I. Grbac, R. Van  
461 Damme, and D. Irschick. 2008. Rapid large-scale evolutionary divergence in  
462 morphology and performance associated with exploitation of a different dietary  
463 resource. Proc. Nat. Acad. Sci. USA 105:4792-4795.
- 464 Hill, J.K., C.D. Thomas, and O.T. Lewis. 1999. Flight morphology in fragmented populations  
465 of a rare British butterfly, *Hesperia comma*. Biol. Conserv. 87:277-283.
- 466 Hobbs, A.M. 2005. Assessment of the status of the red squirrel in central Wales. Mid Wales  
467 Red Squirrel Project Report.
- 468 Holmes, M.W., T.T. Hammond, G.O.U. Wogan, R.E. Walsh, K. La Barbera, E.A.  
469 Wommack, F.M. Martins, J.C. Crawford, K. L. Mack, L.M. Bloch, and M.W.  
470 Nachman. 2016. Natural history collections as windows on evolutionary processes.  
471 Mol. Ecol. 25:864-881.

- 472 Kenward, R.E., and K.H. Hodder. 1998. Red squirrels (*Sciurus vulgaris*) released in conifer  
473 woodland: the effects of source habitat, predation and interactions with grey squirrels  
474 (*Sciurus carolinensis*). *J. Zool.* 244:23-32.
- 475 Klingenberg, C.P. 2011. MorphoJ: an integrated software package for geometric  
476 morphometrics. *Mol. Ecol. Res.* 11:353-357.
- 477 Kristjansson, B.K. 2005. Rapid morphological changes in threespine stickleback,  
478 *Gasterosteus aculeatus*, in freshwater. *Environ. Biol. Fish* 74:357-363.
- 479 LaRose, J.P., A.L. Meredith, D.J. Everest, C. Fiegna, C.J. McInnes, D.J. Shaw, and E.M.  
480 Milne. 2010. Epidemiological and post-mortem findings in 262 red squirrels (*Sciurus*  
481 *vulgaris*) in Scotland, 2005 to 2009. *Vet. Rec.* 167:297-302.
- 482 Leamy, L.J., E.J. Routman, and J.M. Cheverud. 2002. An epistatic genetic basis for  
483 fluctuating asymmetry of mandible size in mice. *Evol.* 56:642-653.
- 484 Lloyd, H.G. 1983. Past and present distribution of red and grey squirrels. *Mammal Rev.*  
485 13:69-80.
- 486 Losos, J.B., K.I. Warheit, and T.W. Schoener. 1997. Adaptive differentiation following  
487 experimental island colonization in *Anolis* lizards. *Nature* 387:70-73.
- 488 Lowe, V.P.W., and A.S. Gardiner. 1983. Is the British squirrel (*Sciurus vulgaris leucourus*  
489 Kerr) British? *Mammal Rev.* 13:57-67.
- 490 Magris, L., and J. Gurnell. 2002. Population ecology of the red squirrel (*Sciurus vulgaris*) in  
491 a fragmented woodland ecosystem on the Island of Jersey, Channel Islands. *J. Zool.*  
492 256:99-112.
- 493 Markow, T.A. 1995. Evolutionary ecology and developmental instability. *Ann. Rev.*  
494 *Entomol.* 40:105-120.
- 495 Mathews, F., L.M. Kubasiewicz, J. Gurnell, C.A. Harrower, R.A. McDonald, and R.F. Shore.  
496 2018. A review of the population and conservation status of British mammals. A

- 497 report by the Mammal Society under contract to Natural England, Natural Resources  
498 Wales and Scottish Natural Heritage. Natural England, Peterborough, UK.
- 499 Maynard Smith, J., and R.J.G. Savage. 1959. The mechanics of mammalian jaws. *Sch. Sci.*  
500 *Rev.* 40:289-301.
- 501 Millien, V. 2006. Morphological evolution is accelerated among island mammals. *PLoS Biol.*  
502 4:e321.
- 503 Mollar, H. 1983. Foods and foraging behaviour of red (*Sciurus vulgaris*) and grey (*Sciurus*  
504 *carolinensis*) squirrels. *Mammal Rev.* 13:81-98.
- 505 Morris, P.A., K. Meakin, and S. Sharafi. 1993. The behaviour and survival of rehabilitated  
506 hedgehogs (*Erinaceus europaeus*). *Anim. Welf.* 2:53-66.
- 507 Nargosen, D.W., and A. Cardini. 2009. Tempo and mode of evolutionary divergence in  
508 modern and Holocene Vancouver Island marmots (*Marmota vancouverensis*)  
509 (Mammalia, Rodentia). *J. Zool. Syst. Evol. Res.* 47:258-267.
- 510 O'Higgins, P. 2000. The study of morphological variation in the hominid fossil record:  
511 biology, landmarks and geometry. *J. Anat.* 197:103-120.
- 512 Orr, M.R., and T.B. Smith. 1998. Ecology and speciation. *Trends Ecol. Evol.* 13:502-506.
- 513 Pergams, O.R.W., and M.V. Ashley. 1999. Rapid morphological evolution in Channel Island  
514 deer mice. *Evolution* 53:1573-1581.
- 515 Pergams, O.R.W., and M.V. Ashley. 2001. Microevolution in island rodents. *Genetica* 112-  
516 113: 245-256.
- 517 Pergams, O.R.W., and J.J. Lawler. 2009. Recent and widespread rapid morphological change  
518 in rodents. *PLoS ONE* 4:e6452.
- 519 Renaud, S., and V. Millien. 2001. Intra- and interspecific morphological variation in the field  
520 mouse species *Apodemus argenteus* and *A. speciosus* in the Japanese archipelago: the  
521 role of insular isolation and biogeographic gradients. *Biol. J. Linn. Soc.* 74:557-569.

- 522 Renaud, S., E.A. Hardouin, B. Pisanu, and J.-L. Chapuis. 2013. Invasive house mice facing a  
523 changing environment on the Sub-Antarctic Guillou Island (Kerguelen Archipelago).  
524 J. Evol. Biol. 26:612-624.
- 525 Rice-Oxley, S.B. 1993. Caching behaviour of red squirrels *Sciurus vulgaris* under conditions  
526 of high food availability. Mammal. Rev. 23:93-100.
- 527 Rohlf, F.J. 2018. tpsDig2, digitize landmarks and outlines, version 2.31. Department of  
528 Ecology and Evolution, State University of New York at Stony Brook.
- 529 Rushton, S.P., J. Gurnell, P.W.W. Lurz, and R.M. Fuller. 2002. Modeling impacts and costs  
530 of gray squirrel control regimes on the viability of red squirrel populations. J. Wildl.  
531 Manag. 66:683-697.
- 532 Schaefer, K., T. Lauc, P. Mitteroecker, P. Gunz, and F. Bookstein. 2006. Dental arch  
533 asymmetry in an isolated Adriatic community. Am. J. Phys. Anthropol. 129:132-142.
- 534 Schmidt, N.M., and P.M. Jensen. 2003. Changes in mammalian body length over 175 years –  
535 adaptations to a fragmented landscape? Conserv. Ecol. 7:6.
- 536 Shorten, M. 1954. Squirrels. Collins, London.
- 537 Shuttleworth, C.M. 2000. The foraging behaviour and diet of red squirrels *Sciurus vulgaris*  
538 receiving supplemental feeding. Wildl. Biol. 6:149-156.
- 539 Shuttleworth, C.M. 2010. Turning the grey tide – progress in red squirrel recovery. Ecos  
540 31:27-35.
- 541 Simpson, V.R., J. Hargreaves, D.J. Everest, A.S. Baker, P.A. Booth, H.M. Butler, and T.  
542 Blackett. 2010. Mortality in red squirrels (*Sciurus vulgaris*) associated with exudative  
543 dermatitis. Vet. Rec. 167:59-62.
- 544 Snorrason, S.S., S. Skúlason, B. Jonsson, H.J. Malmquist, P.M. Jónasson, O.T. Sandlund, and  
545 T. Lindem. 1994. Trophic specialization in Arctic charr *Salvelinus alpinus* (Pisces;

- 546 Salmonidae): morphological divergence and ontogenetic niche shifts. Biol. J. Linn.  
547 Soc. 52:1-18.
- 548 Stumpff R., L. Fuzessy, and A.P. Paglia. 2018. Environment drivers acting on rodent rapid  
549 morphological change. J. Mammal. Evol. 25:131-140.
- 550 Sumner, J., C. Moritz, and R. Shine. 1999. Shrinking forest shrinks skink: morphological  
551 change in response to rainforest fragmentation in the prickly forest skink  
552 (*Gnypetoscincus queenslandiae*). Biol. Conserv. 91:159-167.
- 553 Tompkins, D.M., A.W. Sainsbury, P. Nettleton, D. Buxton, and J. Gurnell. Parapoxvirus  
554 causes a deleterious disease in red squirrels associated with UK population declines.  
555 2002. Proc. R. Soc. Lond. B 269:529-533.
- 556 Yazdi T., and D. Adriaens. 2011. Patterns of skull shape variation in *Meriones persicus*  
557 (Rodentia: Muridae) in relation to geoclimatical conditions. Iran. J. Animal Biosyst.  
558 7:129-142.
- 559 Yom-Tov, Y., S. Yom-Tov, H. Moller. 1999. Competition, coexistence, and adaptation  
560 amongst rodent invaders to Pacific and New Zealand islands. J. Biogeogr. 26:947-  
561 958.
- 562 Yom-Tov, Y., S. Yom-Tov, G. Jarrell. 2008. Recent increase in body size of the American  
563 marten *Martes Americana* in Alaska. Biol. J. Linn. Soc. 93:701-707.
- 564 Zelditch, M.L., A.R. Wood, R.M. Bonett, and D.L. Swiderski. 2008. Modularity of the rodent  
565 mandible: integrating bones, muscles, and teeth. Evol. Dev. 10:756-768.
- 566 Zelditch, M.L., J. Li, L.A.P. Tran, and D.L. Swiderski. 2015. Relationships of diversity,  
567 disparity, and their evolutionary rates in squirrels (Sciuridae). Evolution 69:1284-  
568 1300.
- 569  
570

571 **TABLES**

572 **Table 1.** Number of specimens from each population in the analysis.

| <b>Population</b> | <b>N</b>   |
|-------------------|------------|
| Formby            | 29         |
| Germany           | 38         |
| Isle of Wight     | 10         |
| Jersey            | 23         |
| North England     | 48         |
| North Scotland    | 86         |
| South Scotland    | 18         |
| Thetford          | 11         |
| <b>Total</b>      | <b>263</b> |

573

574 **Table 2.** Mean MA  $\pm$  standard deviation of masticatory muscles for red squirrel populations.

| <b>Population</b> | <b>Deep masseter</b> | <b>Superficial masseter</b> | <b>Temporalis</b> |
|-------------------|----------------------|-----------------------------|-------------------|
| Formby            | 0.642 $\pm$ 0.018    | 0.402 $\pm$ 0.015           | 0.181 $\pm$ 0.015 |
| Germany           | 0.625 $\pm$ 0.025    | 0.400 $\pm$ 0.021           | 0.210 $\pm$ 0.021 |
| Isle of Wight     | 0.648 $\pm$ 0.024    | 0.390 $\pm$ 0.021           | 0.209 $\pm$ 0.011 |
| Jersey            | 0.640 $\pm$ 0.032    | 0.408 $\pm$ 0.022           | 0.205 $\pm$ 0.014 |
| North England     | 0.647 $\pm$ 0.025    | 0.400 $\pm$ 0.016           | 0.225 $\pm$ 0.015 |
| North Scotland    | 0.647 $\pm$ 0.031    | 0.390 $\pm$ 0.024           | 0.217 $\pm$ 0.014 |
| South Scotland    | 0.656 $\pm$ 0.028    | 0.398 $\pm$ 0.020           | 0.224 $\pm$ 0.016 |
| Thetford          | 0.643 $\pm$ 0.021    | 0.402 $\pm$ 0.023           | 0.223 $\pm$ 0.016 |

575

576



577 **FIGURE LEGENDS**

578 **Figure 1.** Right hemi-mandible of *Sciurus vulgaris* in lateral view showing (A) landmarks

579 used in GMM and (B) in- and out-levers used in biomechanical analysis. Landmarks:

580 1, dorsalmost point on incisor alveolar margin; 2, anterior margin of premolar

581 alveolus; 3, base of coronoid process where it crosses molar alveolar margin; 4, tip of

582 coronoid process; 5, anteriormost point of condyle articular surface; 6, posteriormost

583 point of condyle articular surface; 7, anteriormost point on curve between condyle and

584 angular process; 8, posterior tip of angular process; 9, ventralmost point on angular

585 process; 10, dorsalmost point on ventral border of ramus; 11, anteriormost point on

586 masseteric ridge; 12, ventralmost point on incisor alveolar margin. Levers: DM, deep

587 masseter in-lever; I, incisor out-lever; SM, superficial masseter in-lever; T, temporalis

588 in-lever.

589

590 **Figure 2.** Principal components analysis of red squirrel mandibular shape. (A) PC1 versus

591 PC2; (B) PC3 versus PC4.

592

593 **Figure 3.** Canonical variates analysis of mandibular shape in red squirrel populations. First

594 two CV axes displayed.

595

596 **Figure 4.** Boxplots of masticatory muscle MA in red squirrel populations. (A) deep masseter;

597 (B) superficial masseter; (C) temporalis. Black line represents median, box represents

598 interquartile range, open circles represent data points lying further than 1.5 times the

599 interquartile range from the box.

**A**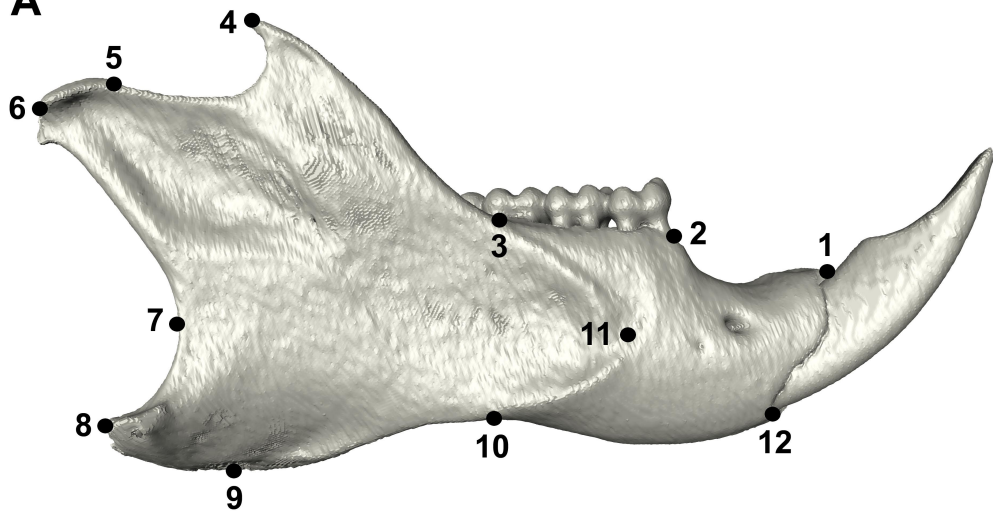**B**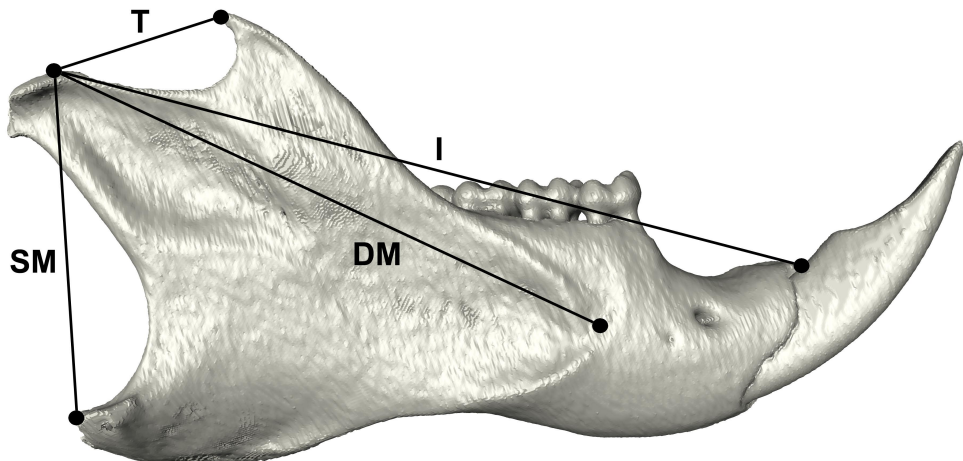

**A**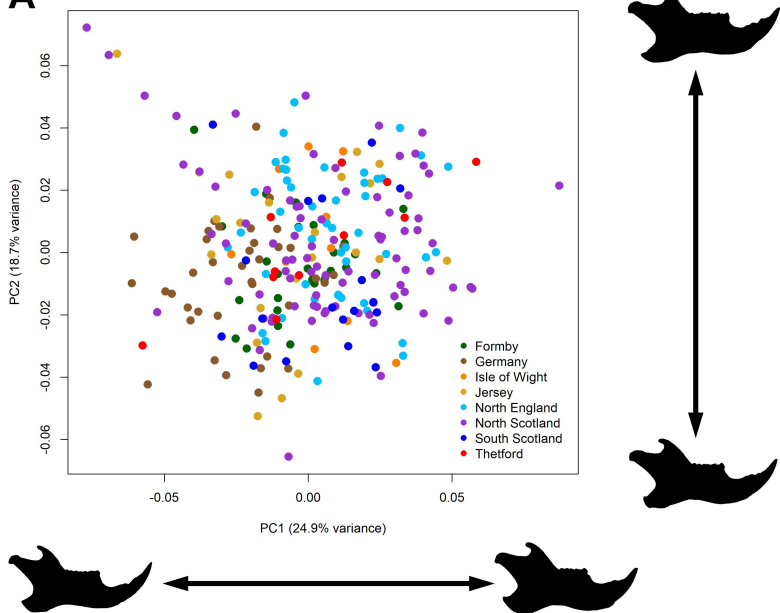**B**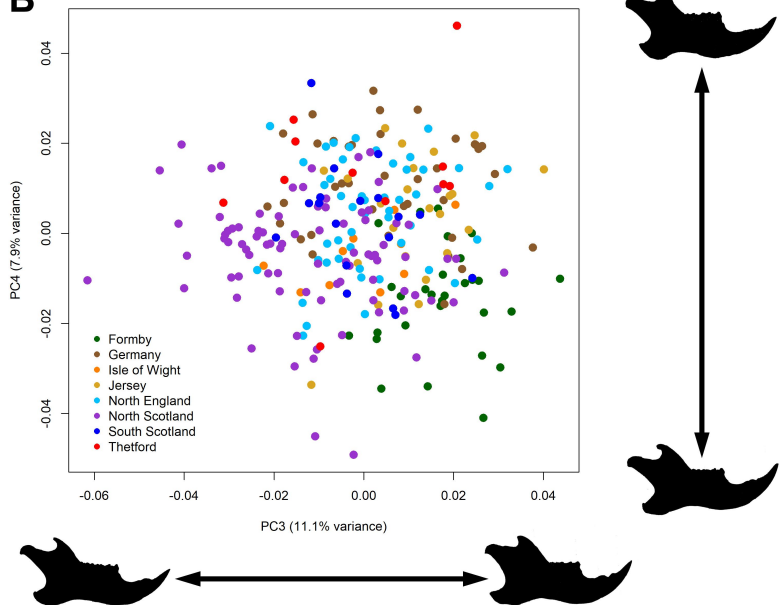

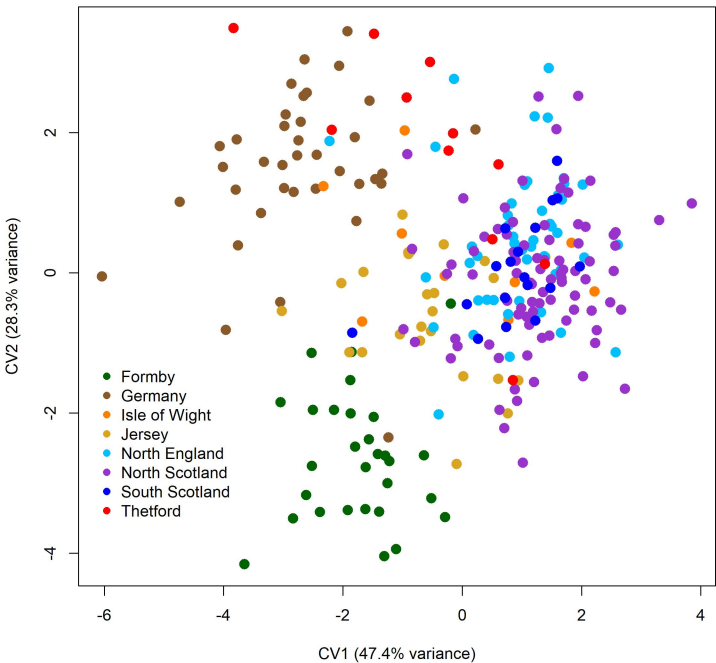

**A**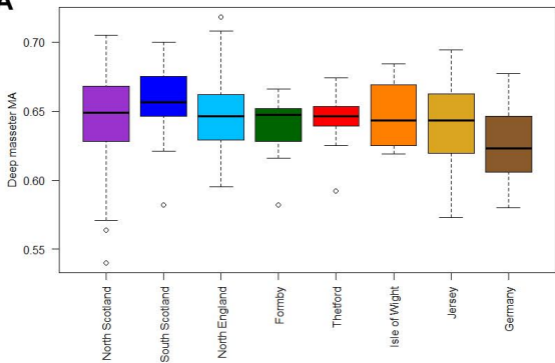**B**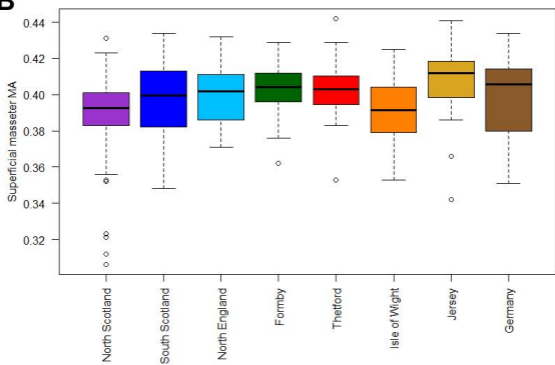**C**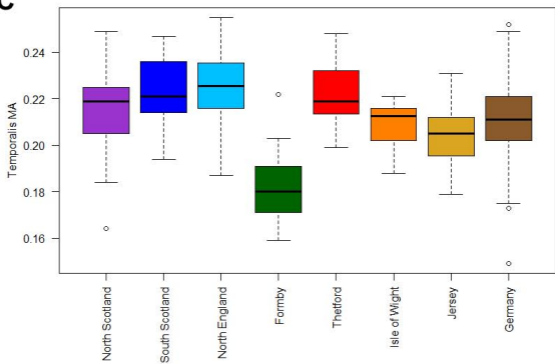

## Population fragmentation leads to morpho-functional variation in British red squirrels

(*Sciurus vulgaris*)

Philip G. Cox, Philip J.R. Morris, Andrew C. Kitchener

### Supplementary Information

**Table S1.** (A) Mahalanobis distances among squirrel populations (below diagonal) and  $P$  values from permutation tests (10000 permutation rounds) (above diagonal). Significant  $P$  values highlighted.

|                | Formby | Germany  | Isle of Wight | Jersey   | North England | North Scotland | South Scotland | Thetford |
|----------------|--------|----------|---------------|----------|---------------|----------------|----------------|----------|
| Formby         |        | < 0.0001 | < 0.0001      | < 0.0001 | < 0.0001      | < 0.0001       | < 0.0001       | < 0.0001 |
| Germany        | 4.237  |          | < 0.0001      | < 0.0001 | < 0.0001      | < 0.0001       | < 0.0001       | < 0.0001 |
| Isle of Wight  | 4.039  | 3.767    |               | 0.0002   | < 0.0001      | 0.0001         | 0.0002         | 0.1485   |
| Jersey         | 3.000  | 3.461    | 2.830         |          | < 0.0001      | < 0.0001       | < 0.0001       | < 0.0001 |
| North England  | 4.308  | 4.017    | 2.739         | 2.846    |               | < 0.0001       | 0.0029         | < 0.0001 |
| North Scotland | 4.043  | 4.269    | 2.507         | 2.774    | 2.054         |                | 0.0009         | < 0.0001 |
| South Scotland | 4.051  | 4.051    | 3.002         | 2.240    | 1.698         | 1.758          |                | 0.0005   |
| Thetford       | 4.855  | 2.847    | 2.659         | 3.025    | 3.234         | 2.985          | 3.094          |          |

**Table S2.** Post-hoc pairwise Tukey tests of temporalis MA between populations. Tukey's Q statistic (below diagonal) and *P* values (above diagonal). Significant *P* values highlighted.

|                | Formby | Germany  | Isle of Wight | Jersey   | North England | North Scotland | South Scotland | Thetford |
|----------------|--------|----------|---------------|----------|---------------|----------------|----------------|----------|
| Formby         |        | < 0.0001 | < 0.0001      | < 0.0001 | 0             | 0              | 0              | < 0.0001 |
| Germany        | 10.63  |          | 1             | 0.9222   | < 0.0001      | 0.3622         | 0.0467         | 0.3077   |
| Isle of Wight  | 6.973  | 0.180    |               | 0.9957   | 0.0790        | 0.8514         | 0.2711         | 0.5579   |
| Jersey         | 7.741  | 1.740    | 1.044         |          | < 0.0001      | 0.0328         | 0.0039         | 0.0557   |
| North England  | 16.91  | 6.246    | 4.086         | 7.161    |               | 0.0659         | 1              | 0.9995   |
| North Scotland | 15.01  | 3.095    | 1.996         | 4.526    | 4.182         |                | 0.6502         | 0.9545   |
| South Scotland | 12.89  | 4.357    | 3.323         | 5.422    | 0.397         | 2.484          |                | 1        |
| Thetford       | 10.52  | 3.227    | 2.675         | 4.268    | 0.752         | 1.568          | 0.370          |          |

**Table S3.** Post-hoc pairwise Tukey tests of superficial masseter MA between populations. Tukey's Q statistic (below diagonal) and *P* values (above diagonal). Significant *P* values highlighted.

|                | Formby | Germany | Isle of Wight | Jersey | North England | North Scotland | South Scotland | Thetford |
|----------------|--------|---------|---------------|--------|---------------|----------------|----------------|----------|
| Formby         |        | 1       | 0.7922        | 0.9725 | 1             | 0.1400         | 0.9986         | 1        |
| Germany        | 0.353  |         | 0.8556        | 0.8976 | 1             | 0.1550         | 0.9999         | 1        |
| Isle of Wight  | 2.160  | 1.983   |               | 0.3411 | 0.8595        | 1              | 0.9806         | 0.8811   |
| Jersey         | 1.430  | 1.841   | 3.145         |        | 0.8634        | 0.0080         | 0.8146         | 0.9970   |
| North England  | 0.432  | 0.071   | 1.971         | 1.959  |               | 0.1245         | 0.9999         | 1        |
| North Scotland | 3.762  | 3.700   | 0.047         | 5.142  | 3.832         |                | 0.8126         | 0.5739   |
| South Scotland | 0.873  | 0.611   | 1.344         | 2.101  | 0.570         | 2.106          |                | 0.9993   |
| Thetford       | 0.108  | 0.366   | 1.900         | 0.985  | 0.420         | 2.642          | 0.784          |          |

**Table S4.** Post-hoc pairwise Tukey tests of deep masseter MA between populations. Tukey's Q statistic (below diagonal) and *P* values (above diagonal). Significant *P* values highlighted.

|                | Formby | Germany | Isle of Wight | Jersey | North England | North Scotland | South Scotland | Thetford |
|----------------|--------|---------|---------------|--------|---------------|----------------|----------------|----------|
| Formby         |        | 0.2097  | 0.9974        | 1      | 0.9905        | 0.9891         | 0.6293         | 1        |
| Germany        | 3.505  |         | 0.2352        | 0.4140 | 0.0068        | 0.0015         | 0.0020         | 0.5139   |
| Isle of Wight  | 0.964  | 3.426   |               | 0.9928 | 1             | 1              | 0.9961         | 0.9999   |
| Jersey         | 0.277  | 2.978   | 1.137         |        | 0.9748        | 0.9709         | 0.5673         | 1        |
| North England  | 1.190  | 5.208   | 0.200         | 1.407  |               | 1              | 0.9300         | 0.9999   |
| North Scotland | 1.219  | 5.780   | 0.274         | 1.444  | 0.118         |                | 0.8763         | 0.9999   |
| South Scotland | 2.528  | 5.671   | 1.027         | 2.656  | 1.704         | 1.917          |                | 0.9165   |
| Thetford       | 0.234  | 2.766   | 0.619         | 0.438  | 0.596         | 0.558          | 1.765          |          |

**Table S5.** Post-hoc pairwise Tukey tests of log centroid size between populations. Tukey's Q statistic (below diagonal) and *P* values (above diagonal). Significant *P* values highlighted.

|                | Formby | Germany | Isle of Wight | Jersey | North England | North Scotland | South Scotland | Thetford |
|----------------|--------|---------|---------------|--------|---------------|----------------|----------------|----------|
| Formby         |        | 0.6776  | 0.0393        | 0.7653 | 0.0049        | 0.0002         | 0.0326         | 0.0087   |
| Germany        | 2.425  |         | 0.0004        | 0.0270 | < 0.0001      | < 0.0001       | < 0.0001       | < 0.0001 |
| Isle of Wight  | 4.440  | 6.263   |               | 0.5667 | 0.9949        | 0.9994         | 0.9997         | 1        |
| Jersey         | 2.226  | 4.617   | 2.657         |        | 0.6437        | 0.3155         | 0.7151         | 0.3047   |
| North England  | 5.336  | 8.533   | 1.073         | 2.497  |               | 0.9998         | 1              | 0.9400   |
| North Scotland | 6.401  | 10.13   | 0.759         | 3.208  | 0.664         |                | 1              | 0.9800   |
| South Scotland | 4.529  | 6.839   | 0.683         | 2.343  | 0.376         | 0.0604         |                | 0.9913   |
| Thetford       | 5.104  | 7.026   | 0.411         | 3.235  | 1.653         | 1.352          | 1.172          |          |
